# Supplementary material for: Towards spatial predictions of disease transmission risk: classical scrapie spill-over from domestic small ruminants to wild cervids
Source: Copernicus journal article supplement (doi:10.5194/we-24-47-2024), 2024-07-04
Supplement: Supplementary file 1 [file we-24-47-2024-supplement.pdf]

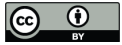

*Supplement of*

## **Towards spatial predictions of disease transmission risk: classical scrapie spill-over from domestic small ruminants to wild cervids**

**Nuno Mouta et al.**

*Correspondence to:* Nuno Mouta (nuno.mouta@cibio.up.pt)

The copyright of individual parts of the supplement might differ from the article licence.

```
## -----biomod2-Based-on-Spectral-information-data----- ##
```

```
## NOTES:
```

```
## (i) This version allows to use either true train absences or
```

```
## pseudo-absences by modifying the parameter useWhat
```

```
##
```

```
## (ii) If using pseudo-absences, the number of pseudo-absences
```

```
## can be modified using the parameter numberOfPseudoAbs (default:
```

```
## is equal to the number of presences)
```

```
##
```

```
## -----Please-have-the-following-packages-installed-----##
```

```
library(biomod2)
```

```
library(raster)
```

```
library(sf)
```

```
library(fasterize)
```

```
library(dplyr)
```

```
library(sp)
```

```
convertToGeoTIFF <- function(inputFolder,outputFolder){
```

```
  fl <- list.files(inputFolder, pattern= ".grd$", full.names = TRUE)
```

```
  if(!dir.exists(outputFolder)){
```

```
    dir.create(outputFolder)
```

```
  }
```

```
  for(f in fl){
```

```
    cat("Converting file:/n",f," .../n",sep="")
```

```
    fn <- tools::file_path_sans_ext(basename(f))
```

```
    raster::stack(f) %>%
```

```
      raster::writeRaster(filename = paste(outputFolder,"/",fn,".tif",sep=""))
```

```
    cat("done!/n/n")
```

```
  }
```

```
}
```

```
# Set working directory
```

```
setwd("C:/.../...")
```

```
# Train polygons from shapefile
```

```
shapeTrain <- "C:/.../.shp"
```

```
trainPolygons <- read_sf(shapeTrain)
```

```
# Use train absences OR pseudo-absences
```

```
useWhat <- " pseudo-absences " # chose between "pseudo-absences , train absences "
```

```
# Input satellite images from folder
```

```
inputDirSatImages <- "C:/.../..."
```

```
imgList <- list.files(inputDirSatImages, pattern=".tif$", full.names = TRUE)
```

```
# Make a raster stack of satellite images
```

```

satImages <- stack(imgList)

names(satImages) <- substr(names(satImages),1,12)

# Convert train polygons to raster, where polygons with 0 represents absence and with 1 presence, please define the field containing this information as Id
rst <- fasterize(trainPolygons, satImages[[1]], field = "Id")

# Create xy data from raster
xyCoords <- xyFromCell(rst, 1:ncell(rst))
rstValues <- values(rst)

trainDF <- as.data.frame(cbind(xyCoords, rstValues))
colnames(trainDF) <- c("x", "y", "Id")

# Set the number of pseudo-absences equal to presence pixels
numberOfPseudoAbs <- nrow(trainDF %>% dplyr::filter(Id == 1))

# Specific values to test can be used like:
# numberOfPseudoAbs <- 500

#Identification of the work
spName <- "study_name"

## ----- ##
## Data formatting and preparation ----
## ----- ##

if(useWhat == "pseudo-absences"){

  # Extract only positive train points and select only the XY cols
  trainData <- trainDF %>%
    dplyr::filter(Id == 1) %>%
    dplyr::select(x, y)

# Convert train data to spatial points object
  spPointsTrain <- SpatialPoints(trainData)

  myBiomodData <- BIOMOD_FormatingData(resp.var = spPointsTrain,
    expl.var = satImages,
    resp.name = spName,
    PA.nb.rep = 3, # Number of Pseudo-Absences sets
    PA.nb.absences = numberOfPseudoAbs,
    PA.strategy = 'random') # PA generation method

}else if(useWhat == "train absences"){

  # Select train data by Id (either 0's OR 1's i.e. true absences and true presences)
  trainData <- trainDF %>% dplyr::filter(Id == 0 | Id == 1)
  # Get XY coordinates
  spPointsTrain <- as.matrix(trainData[,c("x", "y")])

```

```

myBiomodData <- BIOMOD_FormatingData(resp.var = trainData$Id, # 0, 1 input vector
  resp.xy = spPointsTrain, # XY coords for 0's and 1's
  expl.var = satImages,
  resp.name = spName) # PA generation method
}else{
  stop("Wrong option in useWhat parameter! Must be pseudo-absences OR train absences.")
}

## ----- ##
## Calibrate models ----
## ----- ##

myBiomodModelOut <- BIOMOD_Modeling(
  data = myBiomodData, # Input data
  models = c('RF', 'CTA', 'ANN', 'GLM', 'GAM'), # Models to run
  #models.options =
  NbRunEval = 10, # Number of Evaluation runs - default 10
  DataSplit = 80,
  Prevalence = 0.5, # Prevalence between 0 and 1
  VarImport = 5, # Nr of rounds to evaluate variables - default 5
  models.eval.meth = c('TSS','ROC','KAPPA'), # Evaluation metrics
  SaveObj = TRUE,
  rescal.all.models = FALSE,
  do.full.models = TRUE)

# Save calibration object
saveRDS(myBiomodModelOut, paste(spName, "_myBiomodModelOut.RDS", sep=""))

# Get model evaluation values
myBiomodModelEval <- get_evaluations(myBiomodModelOut)

# Print ROC scores
print(myBiomodModelEval["ROC", "Testing.data", , ,])
print(myBiomodModelEval["TSS", "Testing.data", , ,])

# Get boxplot stats
print(fivenum(as.numeric(myBiomodModelEval["ROC", "Testing.data", , ,])))
print(fivenum(as.numeric(myBiomodModelEval["TSS", "Testing.data", , ,])))

# Save evaluation metrics from the arrays
evalDF.ROC <- as.data.frame(myBiomodModelEval["ROC", "Testing.data", , ,])
evalDF.TSS <- as.data.frame(myBiomodModelEval["TSS", "Testing.data", , ,])
evalDF.KAPPA <- as.data.frame(myBiomodModelEval["KAPPA", "Testing.data", , ,])

write.csv(evalDF.ROC, file =
  paste(getwd(), "/", spName, "/", spName, "_evalDF_ROC.csv", sep=""))
write.csv(evalDF.TSS, file = paste(getwd(), "/", spName, "/", spName, "_evalDF_TSS.csv", sep=""))
write.csv(evalDF.KAPPA, file =
  paste(getwd(), "/", spName, "/", spName, "_evalDF_KAPPA.csv", sep=""))

# Calculate variable importance across all PA sets, eval rounds and algorithms
varImportance <- get_variables_importance(myBiomodModelOut)

```



**# Perform the ensembling of projections**

```
myBiomodEF <- BIOMOD_EnsembleForecasting(projection.output = myBiomodProj,  
    binary.meth = c('TSS','ROC','KAPPA'),  
    EM.output = myBiomodEM,  
    output.format = '.tiff')
```

**# Convert all output raster files to GeoTIFF**

```
inFolder <- paste(getwd(),"/",spName,"/proj_",projName,sep="")  
outFolder <- paste(inFolder,"/", "GeoTIFF", sep="")  
dir.create(outFolder)
```

**#Save GeoTIFF(inFolder, outFolder)**

```
save.image(file=paste(spName,"ModObjects-v1.RData",sep="_"))
```
